# Supplementary material for: Experimental and theoretical charge density distribution in Pigment Yellow 101
Source: Royal Society of Chemistry journal article supplement (doi:10.1039/c4cp04302b), 2015-01-01
Supplement: c4cp04302b1.pdf [file c4cp04302b1.pdf]

## Supporting Information for Experimental and Theoretical Charge Density

### Distribution in Pigment Yellow 101

**Table S1** Selected bond lengths and angles in complex **1**. The values in parentheses are from the geometry optimisation, and the excited state (S1) respectively, at the B3LYP/6-31+G\* level of theory.

|                          | Lengths (Å) |                                 | Angle (°) |
|--------------------------|-------------|---------------------------------|-----------|
| O(1) – C(3)              | 1.341 (7)   | N(1) – N(1) <sup>#</sup> – C(1) | 113.6 (4) |
| N(1) – N(1) <sup>#</sup> | 1.385 (8)   | N(1) – C(1) – C(2)              | 121.5 (4) |
| N(1) – C(1)              | 1.298 (7)   | C(1) – C(2) – C(3)              | 120.1 (4) |
| C(1) – C(2)              | 1.446 (7)   | C(1) – C(2) – C(11)             | 120.6 (4) |
| C(2) – C(3)              | 1.404 (7)   | C(3) – C(2) – C(11)             | 119.2 (4) |
| C(3) – C(4)              | 1.416 (7)   | O(1) – C(3) – C(2)              | 122.6 (4) |
| C(4) – C(5)              | 1.369 (6)   | O(1) – C(3) – C(4)              | 116.1 (5) |
| C(5) – C(6)              | 1.423 (7)   | C(2) – C(3) – C(4)              | 120.8 (4) |
| C(6) – C(7)              | 1.419 (7)   | C(3) – C(4) – C(5)              | 120.1 (4) |
| C(6) – C(11)             | 1.425 (7)   | C(4) – C(5) – C(6)              | 121.3 (4) |
| C(7) – C(8)              | 1.377 (6)   | C(5) – C(6) – C(7)              | 120.5 (4) |
| C(8) – C(9)              | 1.413 (7)   | C(5) – C(6) – C(11)             | 119.3 (5) |
| C(9) – C(10)             | 1.380 (8)   | C(7) – C(6) – C(11)             | 120.1 (5) |
| C(10) – C(11)            | 1.421 (9)   | C(6) – C(7) – C(8)              | 120.6 (4) |
|                          |             | C(7) – C(8) – C(9)              | 119.5 (4) |
|                          |             | C(8) – C(9) – C(10)             | 120.8 (3) |
|                          |             | C(9) – C(10) – C(11)            | 121.0 (4) |
|                          |             | C(2) – C(11) – C(6)             | 119.1 (5) |
|                          |             | C(2) – C(11) – C(10)            | 123.1 (4) |
|                          |             | C(6) – C(11) – C(10)            | 117.7 (4) |

**Table S2** Topological analysis of intramolecular covalent bonds. Values in the first row is obtained from multipole refinement (exp), and in the second row from the SHADE refinement and the third row from B3LYP/6-31+G\*\*. Standard uncertainties have been omitted from the table for clarity. They are closely scattered around  $0.02 \text{ e } \text{\AA}^{-3}$  ( $\rho_{\text{bcp}}$ ) and  $0.05 \text{ e } \text{\AA}^{-5}$  ( $\nabla^2\rho_{\text{bcp}}$ ).

| Bond         | $\rho$<br>/ $\text{e}\text{\AA}^{-3}$ | $\nabla^2\rho$<br>/ $\text{e}\text{\AA}^{-5}$ | $\varepsilon$ | $R_{ij}$<br>/ $\text{\AA}$ | $d_1$<br>/ $\text{\AA}$ | $d_2$<br>/ $\text{\AA}$ |
|--------------|---------------------------------------|-----------------------------------------------|---------------|----------------------------|-------------------------|-------------------------|
| N(1)-N(1)    | 2.21                                  | -2.54                                         | 0.06          | 1.385                      | 0.694                   | 0.691                   |
| <i>Shade</i> | 2.24                                  | -2.46                                         | 0.05          | 1.387                      | 0.695                   | 0.691                   |
| DFT          | 2.34                                  | -16.03                                        | 0.04          |                            | 0.689                   | 0.689                   |
| O(1)-C(3)    | 2.14                                  | -19.16                                        | 0.11          | 1.341                      | 0.811                   | 0.530                   |
|              | 2.16                                  | -18.90                                        | 0.09          | 1.343                      | 0.811                   | 0.531                   |
|              | 2.06                                  | -8.68                                         | 0.00          |                            | 0.896                   | 0.446                   |
| O(1)-H(1A)   | 2.59                                  | -26.23                                        | 0.02          | 0.967                      | 0.716                   | 0.251                   |
|              | 2.15                                  | -27.64                                        | 0.02          | 0.967                      | 0.757                   | 0.210                   |
|              | 2.20                                  | -44.23                                        | 0.02          |                            | 0.812                   | 0.186                   |
| N(1)-C(1)    | 2.53                                  | -26.68                                        | 0.24          | 1.299                      | 0.773                   | 0.526                   |
|              | 2.55                                  | -26.95                                        | 0.24          | 1.30                       | 0.776                   | 0.524                   |
|              | 2.48                                  | -19.51                                        | 0.18          |                            | 0.861                   | 0.443                   |
| C(1)-C(2)    | 1.92                                  | -14.27                                        | 0.21          | 1.446                      | 0.734                   | 0.712                   |
|              | 1.91                                  | -14.47                                        | 0.20          | 1.446                      | 0.734                   | 0.712                   |
|              | 1.94                                  | -17.94                                        | 0.16          |                            | 0.742                   | 0.702                   |
| C(2)-C(3)    | 2.15                                  | -18.23                                        | 0.27          | 1.404                      | 0.681                   | 0.723                   |
|              | 2.15                                  | -18.22                                        | 0.28          | 1.404                      | 0.684                   | 0.719                   |
|              | 2.07                                  | -19.68                                        | 0.25          |                            | 0.683                   | 0.729                   |
|              |                                       |                                               |               |                            |                         |                         |

|            |      |         |      |       |        |       |
|------------|------|---------|------|-------|--------|-------|
| C(2)-C(11) | 1.87 | -13.51  | 0.22 | 1.442 | 0.718  | 0.723 |
|            | 1.88 | -13.59  | 0.21 | 1.442 | 0.715  | 0.726 |
|            | 1.90 | -16.88  | 0.16 |       | 0.726  | 0.724 |
| C(3)-C(4)  | 2.05 | -16.01  | 0.22 | 1.417 | 0.736  | 0.681 |
|            | 2.06 | -16.47  | 0.21 | 1.416 | 0.730  | 0.686 |
|            | 2.06 | -20.34  | 0.19 |       | 0.735  | 0.684 |
| C(4)-C(5)  | 2.18 | -18.96  | 0.25 | 1.370 | 0.682  | 0.688 |
|            | 2.19 | -19.45  | 0.25 | 1.369 | 0.677  | 0.692 |
|            | 2.21 | -22.25  | 0.25 |       | 0.688  | 0.682 |
| C(5)-C(6)  | 2.00 | -15.53  | 0.19 | 1.423 | 0.719  | 0.704 |
|            | 2.02 | -16.090 | 0.20 | 1.423 | 0.7131 | 0.710 |
|            | 2.01 | -18.99  | 0.14 |       | 0.718  | 0.708 |
| C(6)-C(7)  | 2.00 | -15.57  | 0.18 | 1.420 | 0.711  | 0.709 |
|            | 2.01 | -15.83  | 0.20 | 1.419 | 0.709  | 0.710 |
|            | 2.03 | -19.20  | 0.17 |       | 0.712  | 0.707 |
| C(6)-C(11) | 2.00 | -15.35  | 0.19 | 1.426 | 0.714  | 0.712 |
|            | 2.00 | -15.809 | 0.18 | 1.425 | 0.717  | 0.708 |
|            | 1.98 | -18.26  | 0.16 |       | 0.712  | 0.721 |
| C(7)-C(8)  | 2.23 | -19.81  | 0.19 | 1.378 | 0.680  | 0.698 |
|            | 2.23 | -20.04  | 0.22 | 1.377 | 0.673  | 0.705 |
|            | 2.17 | -21.66  | 0.24 |       | 0.685  | 0.694 |
| C(8)-C(9)  | 2.03 | -15.98  | 0.19 | 1.414 | 0.698  | 0.716 |
|            | 2.03 | -16.40  | 0.19 | 1.413 | 0.699  | 0.705 |
|            | 2.05 | -19.70  | 0.17 |       | 0.708  | 0.703 |
|            |      |         |      |       |        |       |

|             |      |        |      |       |       |       |
|-------------|------|--------|------|-------|-------|-------|
| C(9)-C(10)  | 2.14 | -18.32 | 0.25 | 1.380 | 0.681 | 0.699 |
|             | 2.14 | -18.34 | 0.25 | 1.379 | 0.684 | 0.696 |
|             | 2.16 | -21.31 | 0.24 |       | 0.691 | 0.692 |
| C(10)-C(11) | 2.03 | -16.30 | 0.19 | 1.422 | 0.706 | 0.715 |
|             | 2.05 | -16.48 | 0.19 | 1.421 | 0.707 | 0.714 |
|             | 2.01 | -18.82 | 0.17 |       | 0.704 | 0.718 |

**Table S3** Geometrical details of hydrogen bonds and non-covalent interactions.

Values in the first row are obtained from multipole refinement, and in the second row (for intramolecular contacts only) from B3LYP/6-31+G\*\*.

|                    | $d_{1-2} / \text{\AA}$ | $d_{1-3} / \text{\AA}$ | Angle ( $^{\circ}$ ) |
|--------------------|------------------------|------------------------|----------------------|
| Intermolecular     |                        |                        |                      |
| C(9)⋯H(1)–C(1)     | 2.83(1)                | 3.88(1)                | 162.3(1)             |
| O(1) ⋯ H(9) – C(9) | 2.46(1)                | 3.35(1)                | 138.2(1)             |
| Intramolecular     |                        |                        |                      |
| N(1)⋯H(1A) – O(1)  | 1.68(1)                | 2.57(1)                | 150.9(1)             |
|                    | 1.699                  | 2.589                  | 146.3                |
| H(10)⋯H(1)         | 1.97(1)                |                        |                      |
|                    | 1.974                  |                        |                      |

**Figure S1** Total electron density plots in central region of **1** from a) experiment and b) theory.

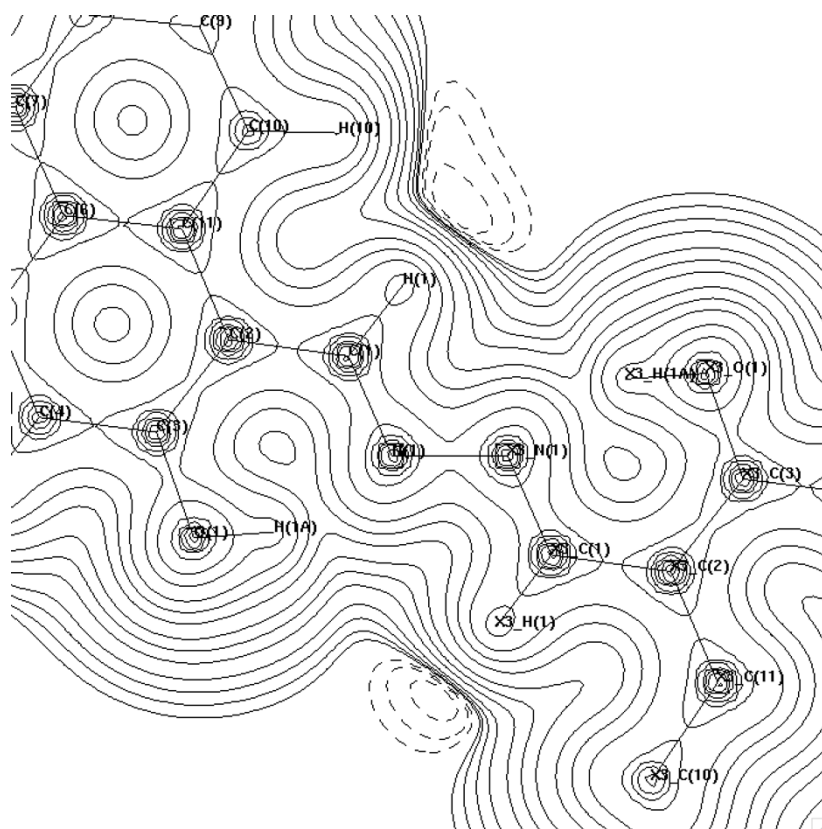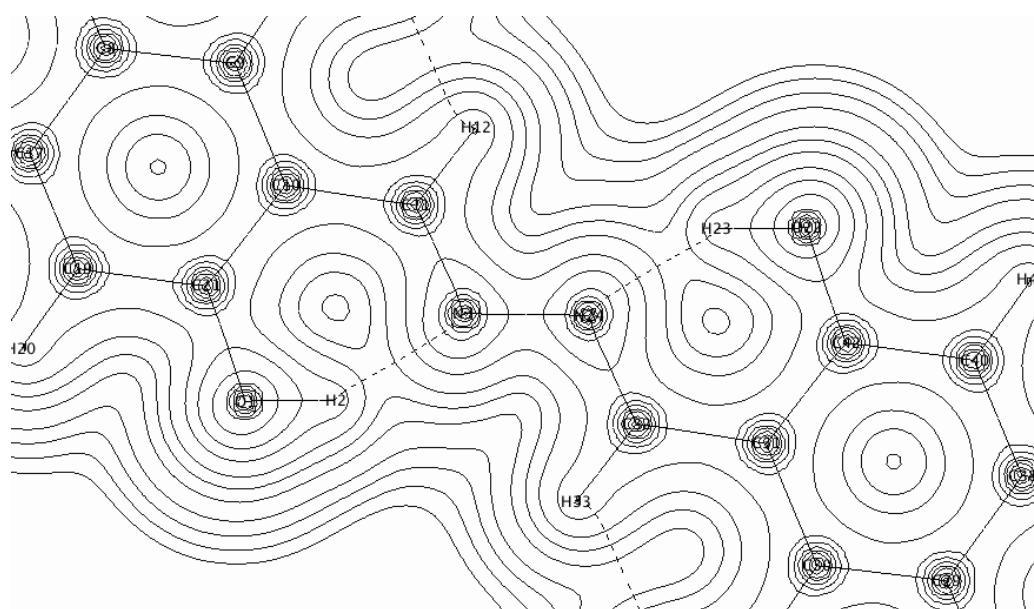

**Figure S2** Total density along N—N bond close to bond critical point, and quadratic fit to this.

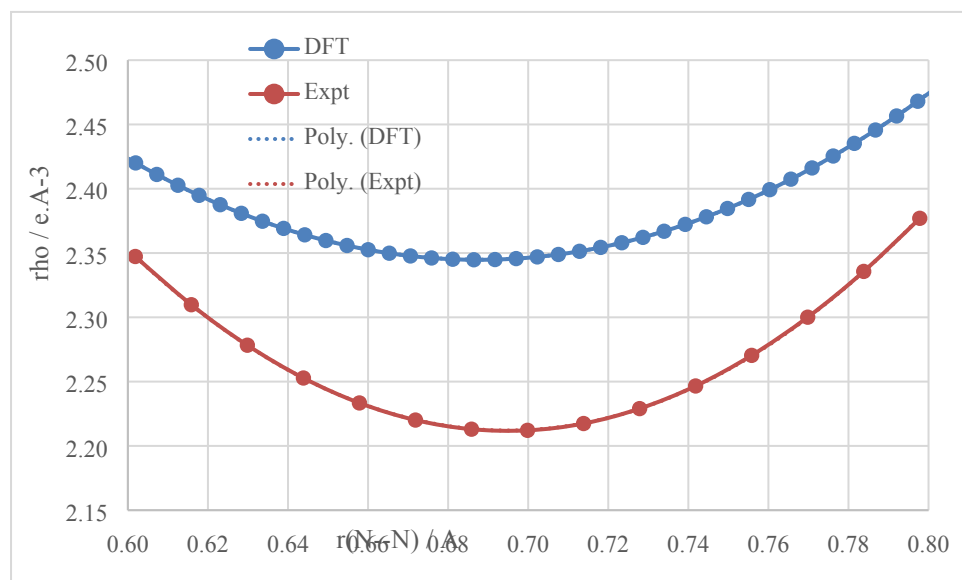

**Table S4** Effect of functional, basis set and geometry on selected bond critical point properties.

| Bond  | Method/Basis/Geom <sup>a</sup> | $\rho$ | $\nabla^2\rho$ | $\% \delta r$ <sup>b</sup> | $\% \delta \nabla^2\rho$ <sup>b</sup> |
|-------|--------------------------------|--------|----------------|----------------------------|---------------------------------------|
| N-N   | 1                              | 2.345  | -16.029        |                            |                                       |
|       | 2                              | 2.308  | -15.538        | -1.6                       | -3.1                                  |
|       | 3                              | 2.324  | -14.978        | -0.9                       | -6.6                                  |
|       | 4                              | 2.340  | -16.190        | -0.2                       | 1.0                                   |
|       | 5                              | 2.349  | -16.462        | 0.2                        | 2.7                                   |
| N...H | 1                              | 0.356  | 2.920          |                            |                                       |
|       | 2                              | 0.366  | 3.163          | 2.9                        | 8.3                                   |
|       | 3                              | 0.363  | 2.793          | 1.9                        | -4.4                                  |
|       | 4                              | 0.352  | 2.947          | -1.2                       | 0.9                                   |
|       | 5                              | 0.351  | 3.004          | -1.3                       | 2.9                                   |

<sup>a</sup> 1: B3LYP/6-31+G(d,p) at optimised geometry; 2: B3LYP/6-31+G(d,p) at Xray geometry; 3: B3LYP/6-311++G(d,p) at optimised geometry; 4: M06-2X/6-31+G(d,p) at optimised geometry; 5:  $\omega$ B97x-D/6-31+G(d,p) at optimised geometry. <sup>b</sup> Percentage difference from B3LYP/6-31+G(d,p) at optimised geometry



**Table S5a** *Experimental Monopole Populations, Radial Parameters and Net Atomic Charges.*

| Atom  | Pval      | Kappa    | P00   | Kappa' | Net charge |
|-------|-----------|----------|-------|--------|------------|
| O(1)  | 6.249(28) | 0.991(2) | 0.000 | 1.000  | -0.248(28) |
| N(1)  | 5.214(28) | 0.993(2) | 0.000 | 1.000  | -0.214(28) |
| C(1)  | 3.989(25) | 1.014(2) | 0.000 | 1.000  | +0.011(25) |
| C(2)  | 4.014(20) | 1.014(2) | 0.000 | 1.000  | -0.013(20) |
| C(3)  | 4.022(22) | 1.014(2) | 0.000 | 1.000  | -0.022(22) |
| C(4)  | 3.991(23) | 1.014(2) | 0.000 | 1.000  | +0.008(23) |
| C(5)  | 3.991(24) | 1.014(2) | 0.000 | 1.000  | +0.009(24) |
| C(6)  | 4.004(21) | 1.014(2) | 0.000 | 1.000  | -0.003(21) |
| C(7)  | 3.948(23) | 1.014(2) | 0.000 | 1.000  | +0.051(23) |
| C(8)  | 4.055(26) | 1.014(2) | 0.000 | 1.000  | -0.054(26) |
| C(9)  | 3.971(25) | 1.014(2) | 0.000 | 1.000  | +0.029(25) |
| C(10) | 4.009(24) | 1.014(2) | 0.000 | 1.000  | -0.009(24) |
| C(11) | 3.996(22) | 1.014(2) | 0.000 | 1.000  | +0.003(22) |
| H(1A) | 0.981(18) | 1.200    | 0.000 | 1.200  | +0.018(18) |
| H(1)  | 0.904(15) | 1.200    | 0.000 | 1.200  | +0.096(15) |
| H(4)  | 0.984(14) | 1.200    | 0.000 | 1.200  | +0.015(14) |
| H(5)  | 0.890(15) | 1.200    | 0.000 | 1.200  | +0.109(15) |
| H(7)  | 0.951(15) | 1.200    | 0.000 | 1.200  | +0.048(15) |
| H(8)  | 0.982(15) | 1.200    | 0.000 | 1.200  | +0.018(15) |
| H(9)  | 0.965(15) | 1.200    | 0.000 | 1.200  | +0.035(15) |
| H(10) | 0.890(14) | 1.200    | 0.000 | 1.200  | +0.109(14) |

**Table S5b** *Experimental* Dipole Population Parameters.

| Atom  | D11+      | D11-      | D10       | Kappa' |
|-------|-----------|-----------|-----------|--------|
| O(1)  | -0.070(5) | -0.061(4) | -0.001(4) | 1.000  |
| N(1)  | -0.039(5) | 0.106(5)  | 0.000(5)  | 1.000  |
| C(1)  | -0.022(8) | 0.036(8)  | -0.023(7) | 1.000  |
| C(2)  | 0.015(8)  | -0.009(7) | 0.006(7)  | 1.000  |
| C(3)  | -0.093(8) | -0.005(8) | -0.002(7) | 1.000  |
| C(4)  | -0.040(9) | -0.003(8) | 0.008(7)  | 1.000  |
| C(5)  | -0.042(8) | -0.007(8) | 0.006(7)  | 1.000  |
| C(6)  | -0.001(8) | -0.021(8) | -0.012(7) | 1.000  |
| C(7)  | -0.033(9) | 0.006(8)  | -0.001(8) | 1.000  |
| C(8)  | -0.026(9) | 0.031(8)  | -0.001(7) | 1.000  |
| C(9)  | -0.052(9) | -0.008(8) | 0.002(7)  | 1.000  |
| C(10) | -0.030(9) | 0.024(8)  | 0.006(8)  | 1.000  |
| C(11) | 0.012(8)  | 0.009(7)  | 0.021(7)  | 1.000  |
| H(1A) | 0.183(16) | 0.009(11) | 0.000     | 1.200  |
| H(1)  | 0.191(11) | 0.000     | 0.000     | 1.200  |
| H(4)  | 0.190(12) | 0.000     | 0.000     | 1.200  |
| H(5)  | 0.181(11) | 0.000     | 0.000     | 1.200  |
| H(7)  | 0.172(12) | 0.000     | 0.000     | 1.200  |
| H(8)  | 0.183(12) | 0.000     | 0.000     | 1.200  |
| H(9)  | 0.184(13) | 0.000     | 0.000     | 1.200  |
| H(10) | 0.161(11) | 0.000     | 0.000     | 1.200  |

**Table S5c** *Experimental* Quadrupole Population Parameters.

| Atom  | Q20       | Q21+      | Q21-      | Q22+      | Q22-      | Kappa' |
|-------|-----------|-----------|-----------|-----------|-----------|--------|
| O(1)  | 0.026(6)  | -0.013(6) | 0.025(6)  | 0.029(6)  | 0.049(5)  | 1.000  |
| N(1)  | -0.097(6) | 0.035(6)  | 0.000(6)  | 0.025(6)  | -0.085(5) | 1.000  |
| C(1)  | -0.189(8) | -0.013(7) | 0.036(7)  | 0.000(7)  | 0.015(7)  | 1.000  |
| C(2)  | -0.119(8) | 0.002(7)  | -0.034(7) | 0.019(7)  | 0.002(8)  | 1.000  |
| C(3)  | -0.178(8) | -0.033(7) | -0.001(7) | -0.068(8) | -0.015(7) | 1.000  |
| C(4)  | -0.147(8) | 0.006(7)  | -0.029(8) | -0.007(8) | -0.039(8) | 1.000  |
| C(5)  | -0.178(8) | 0.014(7)  | -0.033(8) | -0.013(8) | -0.018(8) | 1.000  |
| C(6)  | -0.168(7) | 0.019(7)  | 0.005(7)  | 0.002(8)  | -0.008(8) | 1.000  |
| C(7)  | -0.178(8) | -0.009(7) | -0.008(8) | -0.031(9) | -0.025(8) | 1.000  |
| C(8)  | -0.139(8) | 0.036(7)  | -0.001(8) | -0.064(9) | -0.021(8) | 1.000  |
| C(9)  | -0.156(8) | -0.037(8) | 0.026(8)  | -0.014(9) | 0.007(8)  | 1.000  |
| C(10) | -0.166(8) | -0.016(7) | 0.014(7)  | -0.010(8) | -0.003(8) | 1.000  |
| C(11) | -0.167(7) | 0.007(7)  | 0.032(7)  | 0.016(7)  | -0.012(8) | 1.000  |
| H(1A) | 0.000     | 0.000     | 0.000     | 0.000     | 0.000     | 1.200  |
| H(1)  | 0.000     | 0.000     | 0.000     | 0.000     | 0.000     | 1.200  |
| H(4)  | 0.000     | 0.000     | 0.000     | 0.000     | 0.000     | 1.200  |
| H(5)  | 0.000     | 0.000     | 0.000     | 0.000     | 0.000     | 1.200  |
| H(7)  | 0.000     | 0.000     | 0.000     | 0.000     | 0.000     | 1.200  |
| H(8)  | 0.000     | 0.000     | 0.000     | 0.000     | 0.000     | 1.200  |
| H(9)  | 0.000     | 0.000     | 0.000     | 0.000     | 0.000     | 1.200  |
| H(10) | 0.000     | 0.000     | 0.000     | 0.000     | 0.000     | 1.200  |

**Table S5d** *Experimental Octupole Population Parameters.*

| Atom<br>O33- | O30<br>Kappa' | O31+      | O31-      | O32+      | O32-      | O33+       |
|--------------|---------------|-----------|-----------|-----------|-----------|------------|
| O(1)         | -0.015(6)     | -0.022(5) | -0.010(5) | -0.013(5) | -0.005(5) | 0.088(5)   |
| -0.054(5)    | 1.000         |           |           |           |           |            |
| N(1)         | -0.006(7)     | 0.000(6)  | 0.036(6)  | -0.002(6) | 0.005(6)  | 0.150(6)   |
| 0.009(6)     | 1.000         |           |           |           |           |            |
| C(1)         | -0.010(9)     | -0.021(8) | 0.040(8)  | 0.013(8)  | -0.001(8) | 0.249(9) - |
| 0.018(8)     | 1.000         |           |           |           |           |            |
| C(2)         | 0.004(9)      | 0.005(8)  | -0.009(8) | -0.006(8) | 0.020(8)  | 0.233(8) - |
| 0.014(9)     | 1.000         |           |           |           |           |            |
| C(3)         | 0.005(9)      | -0.027(8) | 0.001(8)  | -0.004(8) | 0.009(8)  | 0.271(9)   |
| 0.032(9)     | 1.000         |           |           |           |           |            |
| C(4)         | 0.022(9)      | -0.028(8) | 0.010(8)  | -0.001(8) | 0.011(9)  | 0.211(9) - |
| 0.008(9)     | 1.000         |           |           |           |           |            |
| C(5)         | 0.004(9)      | -0.019(8) | 0.017(8)  | 0.008(8)  | 0.015(8)  | 0.241(9) - |
| 0.016(9)     | 1.000         |           |           |           |           |            |
| C(6)         | -0.009(9)     | -0.003(8) | 0.007(8)  | 0.009(9)  | -0.017(9) | 0.233(9) - |
| 0.016(9)     | 1.000         |           |           |           |           |            |
| C(7)         | 0.006(9)      | -0.009(9) | 0.004(9)  | 0.011(9)  | -0.003(9) | 0.220(9)   |
| 0.060(9)     | 1.000         |           |           |           |           |            |
| C(8)         | -0.002(9)     | 0.008(8)  | -0.013(9) | 0.021(9)  | -0.006(9) | 0.220(9)   |
| 0.007(9)     | 1.000         |           |           |           |           |            |
| C(9)         | 0.014(9)      | 0.004(9)  | 0.023(9)  | -0.006(9) | -0.009(9) | 0.228(9)   |
| 0.036(9)     | 1.000         |           |           |           |           |            |
| C(10)        | 0.008(9)      | -0.010(8) | 0.017(9)  | -0.019(9) | -0.006(8) | 0.239(9)   |
| -0.052(9)    | 1.000         |           |           |           |           |            |
| C(11)        | -0.004(9)     | -0.004(8) | -0.004(8) | 0.012(8)  | -0.018(8) | 0.237(8)   |
| -0.019(9)    | 1.000         |           |           |           |           |            |

**Table S6a** *Shade* Monopole Populations, Radial Parameters and Net Atomic Charges.

| Atom  | Pval      | Kappa    | P00   | Kappa' | Net charge |
|-------|-----------|----------|-------|--------|------------|
| O(1)  | 6.380(26) | 0.985(2) | 0.000 | 1.000  | -0.380(26) |
| N(1)  | 5.190(28) | 0.995(2) | 0.000 | 1.000  | -0.189(28) |
| C(1)  | 4.056(25) | 1.009(2) | 0.000 | 1.000  | -0.055(25) |
| C(2)  | 4.032(20) | 1.009(2) | 0.000 | 1.000  | -0.032(20) |
| C(3)  | 4.054(22) | 1.009(2) | 0.000 | 1.000  | -0.054(22) |
| C(4)  | 4.065(23) | 1.009(2) | 0.000 | 1.000  | -0.065(23) |
| C(5)  | 4.046(24) | 1.009(2) | 0.000 | 1.000  | -0.046(24) |
| C(6)  | 4.034(20) | 1.009(2) | 0.000 | 1.000  | -0.034(20) |
| C(7)  | 4.021(22) | 1.009(2) | 0.000 | 1.000  | -0.020(22) |
| C(8)  | 4.075(26) | 1.009(2) | 0.000 | 1.000  | -0.074(26) |
| C(9)  | 4.046(25) | 1.009(2) | 0.000 | 1.000  | -0.046(25) |
| C(10) | 4.077(23) | 1.009(2) | 0.000 | 1.000  | -0.077(23) |
| C(11) | 4.028(22) | 1.009(2) | 0.000 | 1.000  | -0.027(22) |
| H(1A) | 0.720(13) | 1.200    | 0.000 | 1.200  | +0.280(13) |
| H(1)  | 0.839(14) | 1.200    | 0.000 | 1.200  | +0.161(14) |
| H(4)  | 0.906(13) | 1.200    | 0.000 | 1.200  | +0.093(13) |
| H(5)  | 0.866(14) | 1.200    | 0.000 | 1.200  | +0.134(14) |
| H(7)  | 0.861(14) | 1.200    | 0.000 | 1.200  | +0.139(14) |
| H(8)  | 0.942(14) | 1.200    | 0.000 | 1.200  | +0.058(14) |
| H(9)  | 0.881(14) | 1.200    | 0.000 | 1.200  | +0.119(14) |
| H(10) | 0.881(14) | 1.200    | 0.000 | 1.200  | +0.118(14) |

**Table S6b** *Shade* Dipole Population Parameters.

| Atom  | D11+      | D11-      | D10       | Kappa' |
|-------|-----------|-----------|-----------|--------|
| O(1)  | -0.041(4) | -0.039(4) | 0.002(4)  | 1.000  |
| N(1)  | -0.030(5) | 0.074(5)  | 0.001(5)  | 1.000  |
| C(1)  | -0.008(8) | 0.046(7)  | -0.013(7) | 1.000  |
| C(2)  | 0.017(8)  | 0.001(7)  | 0.002(7)  | 1.000  |
| C(3)  | -0.067(8) | 0.002(8)  | -0.009(7) | 1.000  |
| C(4)  | -0.011(8) | -0.009(8) | -0.003(7) | 1.000  |
| C(5)  | -0.023(8) | -0.002(8) | 0.010(7)  | 1.000  |
| C(6)  | -0.003(8) | -0.009(8) | -0.021(7) | 1.000  |
| C(7)  | -0.008(8) | -0.009(8) | -0.009(8) | 1.000  |
| C(8)  | -0.026(9) | 0.043(8)  | 0.005(7)  | 1.000  |
| C(9)  | -0.037(9) | 0.007(8)  | -0.001(7) | 1.000  |
| C(10) | -0.018(9) | 0.015(8)  | -0.012(8) | 1.000  |
| C(11) | 0.016(8)  | -0.003(7) | 0.015(7)  | 1.000  |
| H(1A) | 0.112(11) | 0.030(8)  | 0.002(7)  | 1.200  |
| H(1)  | 0.171(11) | 0.000     | 0.000     | 1.200  |
| H(4)  | 0.156(11) | 0.000     | 0.000     | 1.200  |
| H(5)  | 0.167(11) | 0.000     | 0.000     | 1.200  |
| H(7)  | 0.151(11) | 0.000     | 0.000     | 1.200  |
| H(8)  | 0.179(11) | 0.000     | 0.000     | 1.200  |
| H(9)  | 0.169(12) | 0.000     | 0.000     | 1.200  |
| H(10) | 0.147(11) | 0.000     | 0.000     | 1.200  |

**Table S6c** *Shade* Quadrupole Population Parameters.

| Atom  | Q20       | Q21+      | Q21-      | Q22+      | Q22-      | Kappa' |
|-------|-----------|-----------|-----------|-----------|-----------|--------|
| O(1)  | 0.026(6)  | -0.017(6) | 0.024(6)  | 0.033(6)  | 0.052(5)  | 1.000  |
| N(1)  | -0.098(6) | 0.035(6)  | -0.005(6) | 0.022(6)  | -0.083(5) | 1.000  |
| C(1)  | -0.186(8) | -0.014(7) | 0.040(7)  | 0.001(7)  | 0.012(7)  | 1.000  |
| C(2)  | -0.122(8) | 0.006(7)  | -0.034(7) | 0.026(7)  | 0.005(8)  | 1.000  |
| C(3)  | -0.178(8) | -0.036(7) | -0.002(7) | -0.074(8) | -0.013(7) | 1.000  |
| C(4)  | -0.151(8) | 0.003(7)  | -0.030(8) | -0.007(8) | -0.031(8) | 1.000  |
| C(5)  | -0.184(8) | 0.008(7)  | -0.030(8) | -0.008(8) | -0.021(8) | 1.000  |
| C(6)  | -0.171(7) | 0.019(7)  | 0.015(7)  | -0.002(8) | -0.010(8) | 1.000  |
| C(7)  | -0.178(8) | -0.015(7) | -0.013(8) | -0.020(9) | -0.026(8) | 1.000  |
| C(8)  | -0.147(8) | 0.046(7)  | 0.005(8)  | -0.061(9) | -0.020(8) | 1.000  |
| C(9)  | -0.154(8) | -0.037(8) | 0.030(8)  | -0.006(9) | 0.006(8)  | 1.000  |
| C(10) | -0.171(8) | -0.017(7) | 0.020(7)  | -0.007(8) | 0.002(8)  | 1.000  |
| C(11) | -0.171(7) | 0.008(7)  | 0.028(7)  | 0.017(7)  | -0.008(8) | 1.000  |
| H(1A) | 0.000     | 0.000     | 0.000     | 0.000     | 0.000     | 1.200  |
| H(1)  | 0.000     | 0.000     | 0.000     | 0.000     | 0.000     | 1.200  |
| H(4)  | 0.000     | 0.000     | 0.000     | 0.000     | 0.000     | 1.200  |
| H(5)  | 0.000     | 0.000     | 0.000     | 0.000     | 0.000     | 1.200  |
| H(7)  | 0.000     | 0.000     | 0.000     | 0.000     | 0.000     | 1.200  |
| H(8)  | 0.000     | 0.000     | 0.000     | 0.000     | 0.000     | 1.200  |
| H(9)  | 0.000     | 0.000     | 0.000     | 0.000     | 0.000     | 1.200  |
| H(10) | 0.000     | 0.000     | 0.000     | 0.000     | 0.000     | 1.200  |

**Table S6d** *Shade* Octupole Population Parameters.

| Atom      | O30       | O31+      | O31-      | O32+      | O32-      | O33+     |   |
|-----------|-----------|-----------|-----------|-----------|-----------|----------|---|
| O33-      | Kappa'    |           |           |           |           |          |   |
| O(1)      | -0.017(6) | -0.018(5) | -0.008(5) | -0.016(5) | -0.002(5) | 0.083(5) |   |
| -0.041(5) | 1.000     |           |           |           |           |          |   |
| N(1)      | -0.008(7) | 0.001(6)  | 0.035(6)  | 0.003(6)  | 0.004(6)  | 0.151(6) |   |
| 0.008(6)  | 1.000     |           |           |           |           |          |   |
| C(1)      | -0.013(9) | -0.021(8) | 0.043(8)  | 0.009(8)  | 0.002(8)  | 0.249(9) | - |
| 0.020(8)  | 1.000     |           |           |           |           |          |   |
| C(2)      | 0.011(8)  | 0.009(8)  | -0.004(8) | -0.009(8) | 0.013(8)  | 0.233(8) | - |
| 0.013(9)  | 1.000     |           |           |           |           |          |   |
| C(3)      | 0.007(9)  | -0.027(8) | 0.005(8)  | -0.006(8) | 0.008(8)  | 0.265(9) |   |
| 0.026(9)  | 1.000     |           |           |           |           |          |   |
| C(4)      | 0.022(9)  | -0.029(8) | 0.015(8)  | -0.004(8) | 0.010(9)  | 0.217(9) | - |
| 0.006(9)  | 1.000     |           |           |           |           |          |   |
| C(5)      | 0.003(9)  | -0.016(8) | 0.012(8)  | 0.004(8)  | 0.017(8)  | 0.246(9) | - |
| 0.032(9)  | 1.000     |           |           |           |           |          |   |
| C(6)      | -0.005(9) | 0.004(8)  | 0.010(8)  | 0.010(9)  | -0.018(9) | 0.242(9) | - |
| 0.015(9)  | 1.000     |           |           |           |           |          |   |
| C(7)      | 0.005(9)  | -0.021(9) | 0.008(9)  | -0.005(9) | 0.003(9)  | 0.225(9) |   |
| 0.058(9)  | 1.000     |           |           |           |           |          |   |
| C(8)      | -0.008(9) | 0.005(8)  | -0.008(9) | 0.027(9)  | -0.005(9) | 0.229(9) | - |
| 0.014(9)  | 1.000     |           |           |           |           |          |   |
| C(9)      | -0.001(9) | -0.002(9) | 0.026(9)  | 0.008(9)  | -0.012(9) | 0.231(9) |   |
| 0.019(9)  | 1.000     |           |           |           |           |          |   |
| C(10)     | 0.010(9)  | -0.012(8) | 0.014(8)  | -0.021(9) | -0.004(8) | 0.238(9) |   |
| -0.054(8) | 1.000     |           |           |           |           |          |   |
| C(11)     | -0.002(9) | -0.004(8) | -0.006(8) | 0.005(8)  | -0.022(8) | 0.235(8) |   |
| -0.020(9) | 1.000     |           |           |           |           |          |   |



**Table S7.** Topological analysis of Heavy atom – Hydrogen bonds. Standard uncertainties have been omitted from the table for clarity. They are closely scattered around  $0.02 \text{ e } \text{\AA}^{-3}$  ( $\rho_{\text{bcp}}$ ) and  $0.05 \text{ e } \text{\AA}^{-5}$  ( $\nabla^2\rho_{\text{bcp}}$ ).

| Bond         | $\rho$<br>/ $\text{e}\text{\AA}^{-3}$ | $\nabla^2\rho$<br>/ $\text{e}\text{\AA}^{-5}$ | $\varepsilon$ | $R_{ij}$<br>/ $\text{\AA}$ | $d_1$<br>/ $\text{\AA}$ | $d_2$<br>/ $\text{\AA}$ |
|--------------|---------------------------------------|-----------------------------------------------|---------------|----------------------------|-------------------------|-------------------------|
| O(1)-H(1A)   | 2.56                                  | -26.23                                        | 0.02          | 0.967                      | 0.716                   | 0.251                   |
| <i>Shade</i> | 2.15                                  | -27.64                                        | 0.02          | -                          | 0.756                   | 0.210                   |
| DFT          | 2.20                                  | -44.20                                        | 0.02          |                            |                         |                         |
| C(1)-H(1)    | 1.91                                  | -18.61                                        | 0.06          | 1.087                      | 0.699                   | 0.387                   |
|              | 1.86                                  | -18.01                                        | 0.06          | -                          | 0.716                   | 0.370                   |
|              | 1.94                                  | -25.56                                        | 0.02          |                            |                         |                         |
| C(4)-H(4)    | 1.89                                  | -17.01                                        | 0.05          | 1.087                      | 0.677                   | 0.410                   |
|              | 1.84                                  | -16.31                                        | 0.05          | -                          | 0.702                   | 0.385                   |
|              | 1.92                                  | -24.96                                        | 0.02          |                            |                         |                         |
| C(5)-H(5)    | 1.85                                  | -17.50                                        | 0.06          | 1.087                      | 0.697                   | 0.389                   |
|              | 1.85                                  | -17.44                                        | 0.06          | -                          | 0.709                   | 0.377                   |
|              | 1.92                                  | -24.82                                        | 0.01          |                            |                         |                         |
| C(7)-H(7)    | 1.83                                  | -16.13                                        | 0.06          | 1.087                      | 0.683                   | 0.404                   |
|              | 1.80                                  | -16.18                                        | 0.05          | -                          | 0.709                   | 0.377                   |
|              | 1.91                                  | -24.50                                        | 0.02          |                            |                         |                         |
| C(8)-H(8)    | 1.83                                  | -15.40                                        | 0.08          | 1.087                      | 0.671                   | 0.416                   |
|              | 1.82                                  | -15.77                                        | 0.08          | -                          | 0.680                   | 0.407                   |
|              | 1.92                                  | -24.67                                        | 0.02          |                            |                         |                         |
| C(9)-H(9)    | 1.85                                  | -16.50                                        | 0.09          | 1.087                      | 0.678                   | 0.409                   |
|              | 1.81                                  | -16.41                                        | 0.08          | -                          | 0.699                   | 0.387                   |

|             |      |        |      |       |       |       |
|-------------|------|--------|------|-------|-------|-------|
|             | 1.92 | -24.76 | 0.02 |       |       |       |
| C(10)-H(10) | 1.83 | -16.60 | 0.07 | 1.087 | 0.702 | 0.385 |
|             | 1.82 | -16.37 | 0.07 | -     | 0.710 | 0.377 |
|             | 1.93 | -24.71 | 0.02 |       |       |       |

---
